# Supplementary material for: Highly sensitive detection of Cr(vi) in groundwater by bimetallic NiFe nanoparticles
Source: Royal Society of Chemistry journal article supplement (doi:10.1039/c6ay03089k), 2017-01-01
Supplement: c6ay03089k1.pdf [file c6ay03089k1.pdf]

## Supplementary data

# Highly sensitive detection of Cr(VI) in groundwater by bimetallic NiFe nanoparticles

Jingtao Liu,<sup>ab†</sup> Yu Ding,<sup>c†</sup> Lifei Ji,<sup>c</sup> Xin Zhang,<sup>c</sup> Fengchun Yang,<sup>c\*</sup> Jiading Wang<sup>a\*</sup> and Weidong Kang<sup>a\*</sup>

**Table S1.** ICP results of Cr(VI) and co-occurring ions in groundwater samples.

| Sample | Well depth (m) | Total Hardness (CaCO <sub>3</sub> ) | Ca <sup>2+</sup> (ppm) | Mg <sup>2+</sup> (ppm) | K <sup>+</sup> (ppm) | Na <sup>+</sup> (ppm) | Fe (ppm) | Cu (ppm) | Mn (ppm) | Zn (ppm) | Hg (ppm) | Cr <sup>6+</sup> (ppm) | Pb (ppm) | Cd (ppm) | Ni (ppm) | Co (ppm) | Cl <sup>-</sup> (ppm) | SO <sub>4</sub> <sup>2-</sup> (ppm) |
|--------|----------------|-------------------------------------|------------------------|------------------------|----------------------|-----------------------|----------|----------|----------|----------|----------|------------------------|----------|----------|----------|----------|-----------------------|-------------------------------------|
| A      | 18             | 542.5                               | 32.71                  | 111.9                  | 2.41                 | 19.98                 | 0.155    | <0.010   | 0.010    | 0.010    | <0.0001  | 0.044                  | 0.001    | <0.002   | <0.008   | <0.006   | 11.90                 | 13.49                               |
| B      | 200            | 161.9                               | 32.81                  | 19.39                  | 1.57                 | 32.46                 | <0.010   | <0.010   | <0.001   | 0.002    | <0.0001  | 0.006                  | <0.001   | <0.002   | <0.008   | <0.006   | 16.46                 | 30.48                               |
| C      | 290            | 237.4                               | 17.72                  | 46.95                  | 2.28                 | 381.9                 | 0.133    | <0.010   | 0.002    | 0.003    | <0.0001  | 0.114                  | <0.001   | <0.002   | <0.008   | <0.006   | 234.6                 | 277.8                               |
| D      | 300            | 408.7                               | 26.17                  | 83.38                  | 1.82                 | 379.6                 | 0.287    | <0.010   | 0.003    | 0.023    | <0.0001  | 0.240                  | 0.004    | <0.002   | <0.008   | <0.006   | 159.3                 | 467.2                               |
| E      | 400            | 239                                 | 19.65                  | 46.17                  | 1.31                 | 205.6                 | 0.078    | <0.010   | 0.003    | 0.008    | <0.0001  | 0.072                  | 0.003    | <0.002   | <0.008   | <0.006   | 93.84                 | 174.4                               |

<sup>a</sup> State Key Laboratory of Continental Dynamics, Department of Geology, Northwest University, Xi'an 710069, China.

<sup>b</sup> The Institute of Hydrogeology and Environmental Geology, Chinese Academy of Geological Sciences, Shijiazhuang 050061, China.

<sup>c</sup> College of Chemistry and Material Science, Northwest University, Xi'an 710127, China. E-mail: fyang@nwu.edu.cn; Fax/Tel: +86 29 81535026
